# Supplementary material
Source: publisher figshare collection journal article supplement (https://acs.figshare.com/ndownloader/files/14456351)
Supplement: Supplementary file 1 [file 14456351]

## **SUPPORTING INFORMATION**

**For**

**Highly effective removal of pharmaceutical compounds from aqueous solution**

**by magnetic Zr-based MOFs composites**

Ruiqi Zhang, Zhen Wang, Zixin Zhou, Di Li, Tiefeng Wang, Ping Su\*, and Yi Yang\*

Beijing Key Laboratory of Environmentally Harmful Chemical Analysis, College of Science,  
Beijing University of Chemical Technology, Beijing 100029, China

$$\frac{t}{Q_t} = \frac{1}{k_2 Q_e^2} + \frac{1}{Q_e} t$$

where  $k_2$  ( $\text{g mg}^{-1}\text{min}^{-1}$ ) is the kinetic constant of pseudo-second-order adsorption.  $Q_e$  and  $Q_t$  ( $\text{mg g}^{-1}$ ) are the amount of the target absorbed at equilibrium time  $e$  and any time  $t$  (min).

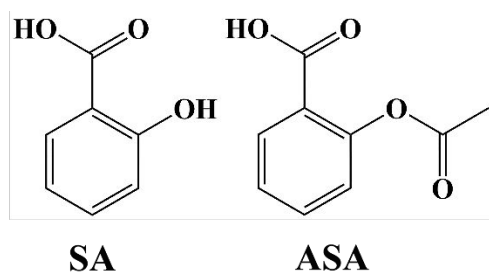

Figure S1. Structures of salicylic acid and acetylsalicylic acid.

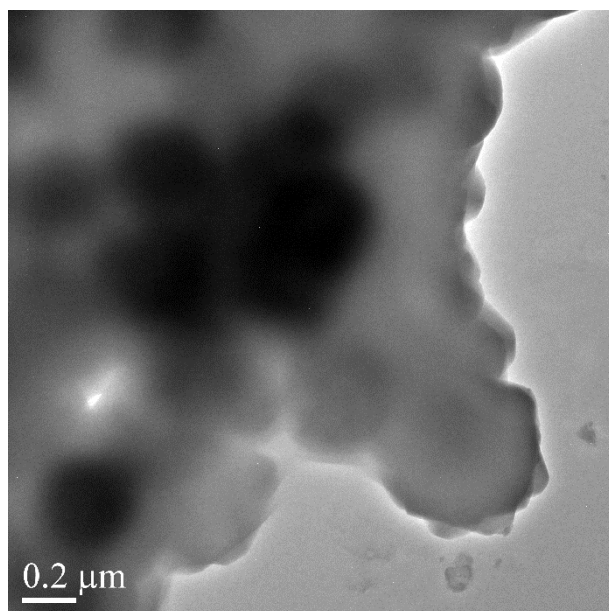

Figure S2. TEM images of  $\text{Fe}_3\text{O}_4@\text{SiO}_2@\text{UiO-66-NH}_2$ .

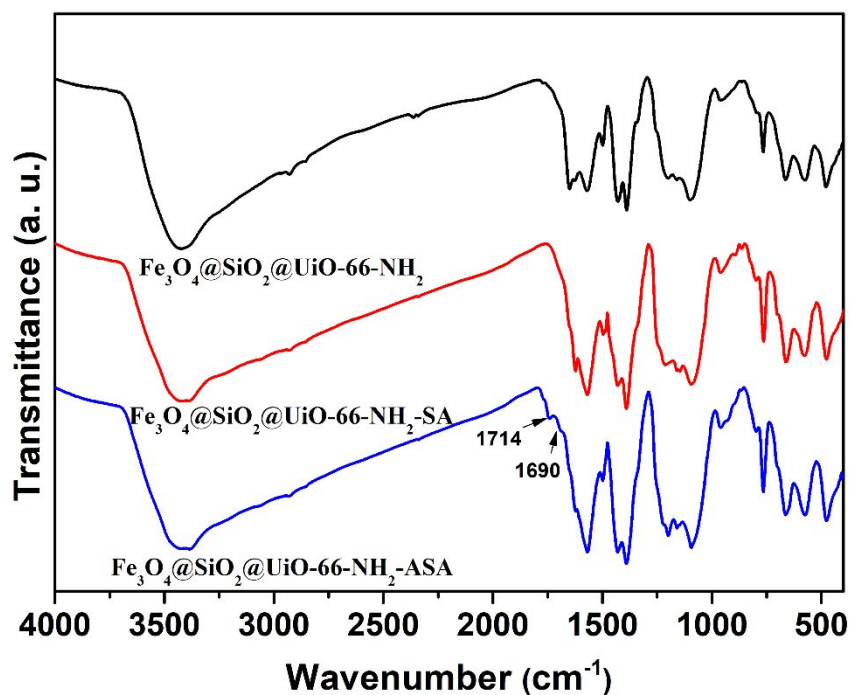

Figure S3. FTIR spectra of the magnetic UiO-66-NH<sub>2</sub> before and after adsorption of SA and ASA.

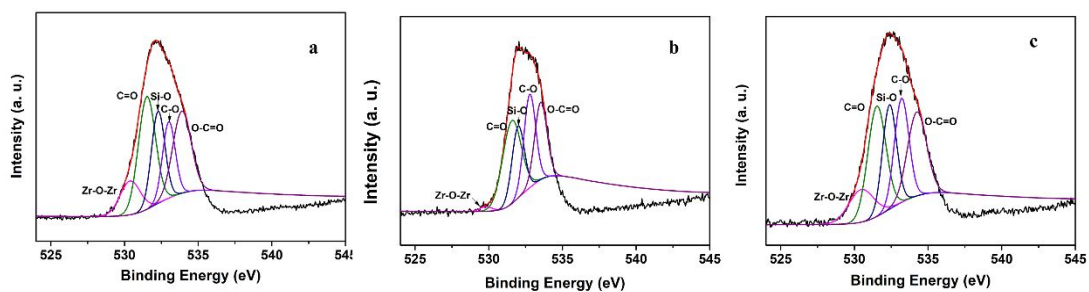

Figure S4. The O1s XPS spectra of the magnetic UiO-66-NH<sub>2</sub> before (a) and after adsorption of SA (b) and ASA (c).

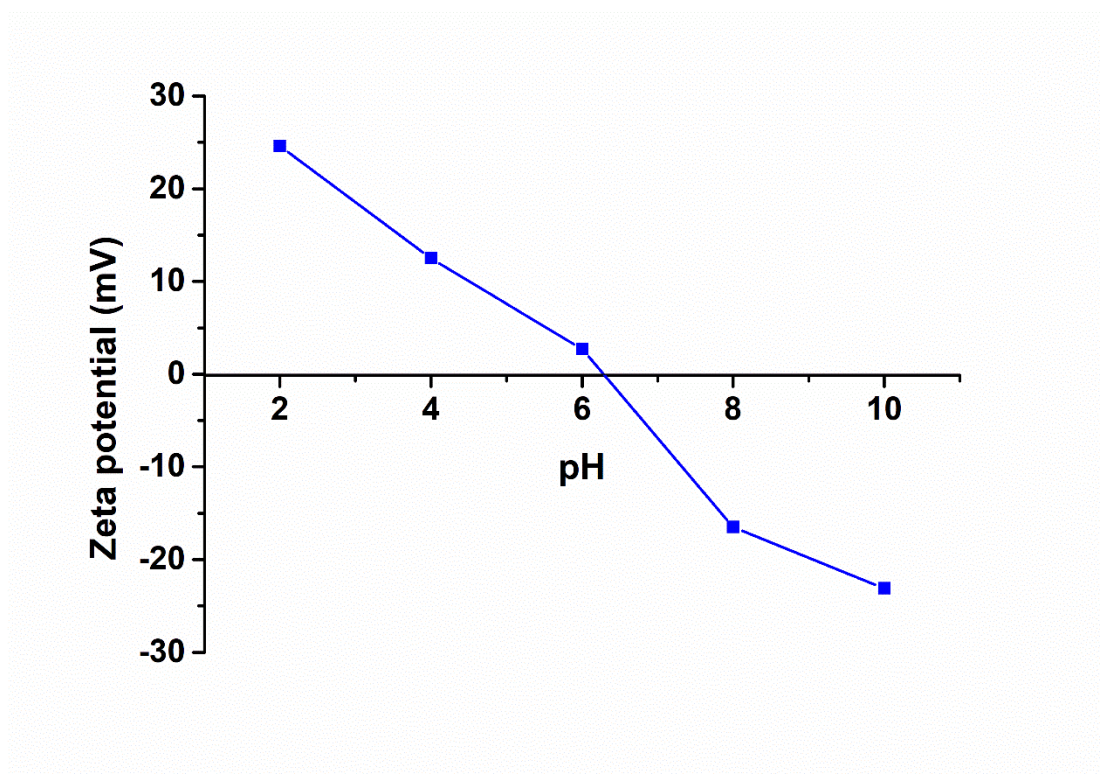

Figure S5. The zeta potential of the magnetic UiO-66-NH<sub>2</sub> as a function of pH.

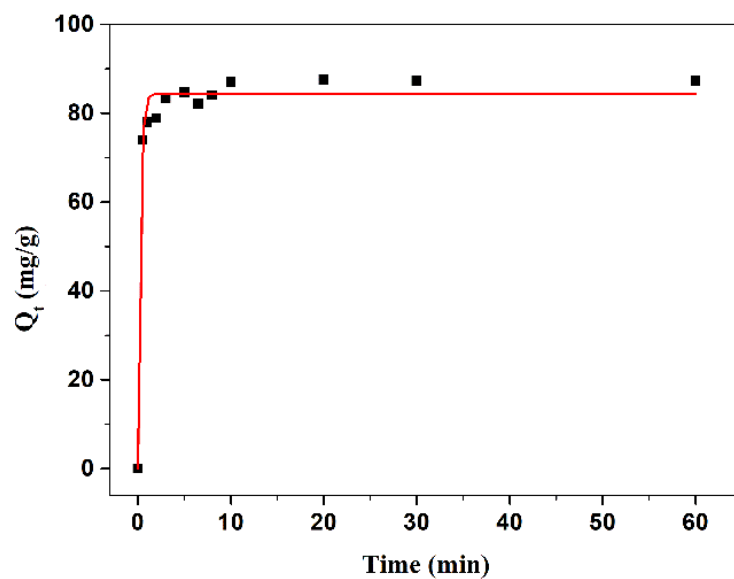

Figure S6. Pseudo-first-order kinetics of SA and adsorption on magnetic UiO-66-NH<sub>2</sub>.

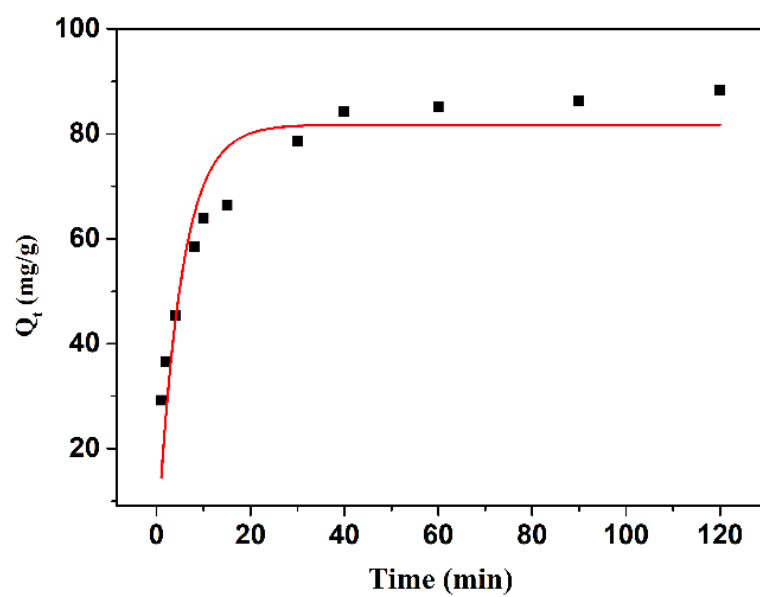

Figure. S7. Pseudo-first-order kinetics of ASA and adsorption on magnetic UiO-66-NH<sub>2</sub>.
